# Supplementary material for: Improving safety of unfractionated heparin: a retrospective, quasi-experimental, observational study of the impact of a pocket card and a computerised prescription aid tool in the University Hospitals of Geneva
Source: HighWire-hosted journal article supplement (doi:10.1136/bmjopen-2021-056912), 2022-03-01
Supplement: bmjopen-2021-056912supp001_data_supplement.pdf [file bmjopen-2021-056912supp001_data_supplement.pdf]

This UFH pocket card was translated solely as a reference for this publication (original in French)

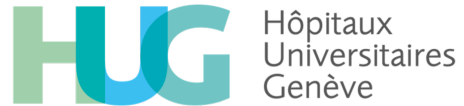

## Monitoring

Check anti-Xa HNF activity:

- 6h (at least 4h) after initial dose
- 6h after each change of dose, or at least 1x/day
- Check platelet levels before starting UFH, then 2-3x/week for 2 weeks

### If anti-Xa level >1.0 IU/ml or < 0.20 IU/ml, check:

- Where blood was drawn: same side as UFH? On the UFH catheter?
- Any other IV meds on the same catheter as UFH?
- Is the syringe pump working? Tubing unobstructed?

# Therapeutic anticoagulation with IV UFH

## Overview

- Prescribe in IU/24h, administer with a syringe pump
- Only use heparin vials (20'000 IU/48 ml)
- CBC, Quick and a PTT should be drawn before starting UFH perfusion

## Administering UFH

- Initial dose : 400 IU/kg/24h in syringe pump (max 40'000 IU/24h)
- In the case of an acute thrombotic event, consider an initial bolus of 50 IU/kg (max 5000 IU)

### No bolus if:

Recent surgery (< 48-72hrs)  
Thrombocytopenia < 50 G/l  
Thrombolysis  
Other causes for increased bleeding

# Therapeutic anticoagulation with IV UFH

## Titration dose protocols (Smith ML et al, *Am J Health Syst Pharm* 2010)

| Anti-Xa HNF activity (UI/ml) | Bolus if prescribed | Other weights                                                                                                        |                                                                                                               |                   |                   |                   |                    |                    |                    |
|------------------------------|---------------------|----------------------------------------------------------------------------------------------------------------------|---------------------------------------------------------------------------------------------------------------|-------------------|-------------------|-------------------|--------------------|--------------------|--------------------|
|                              |                     |                                                                                                                      | If 55-64 kg                                                                                                   | If 65-74 kg:      | If 75-84 kg       | If 85-94 kg       | If 95-104 kg       | If 105-114kg       |                    |
| < 0.20                       | 26 UI/kg*           | ↗ by 96 UI/kg/24hr                                                                                                   | ↗ by 5700 IU/24hr                                                                                             | ↗ by 6700 IU/24hr | ↗ by 7700 IU/24hr | ↗ by 8600 IU/24hr | ↗ by 10000 IU/24hr | ↗ by 11000 IU/24hr |                    |
| 0.20-0.29                    | Non                 | ↗ by 48 IU/kg/24hr                                                                                                   | ↗ by 2900 IU/24hr                                                                                             | ↗ by 3400 IU/24hr | ↗ by 3800 IU/24hr | ↗ by 4300 IU/24hr | ↗ by 4800 IU/24hr  | ↗ by 5300 IU/24hr  |                    |
| 0.30-0.70                    | Non                 | -                                                                                                                    | -                                                                                                             | -                 | -                 | -                 | -                  | -                  |                    |
| 0.71-0.80                    | Non                 | ↘ by 24 IU/kg/24hr                                                                                                   | ↘ by 1400 IU/24hr                                                                                             | ↘ by 1700 IU/24hr | ↘ by 1900 IU/24hr | ↘ by 2200 IU/24hr | ↘ by 2400 IU/24hr  | ↘ by 2600 IU/24hr  |                    |
| 0.81-0.99                    | Non                 | ↘ by 48 IU/kg/24hr                                                                                                   | ↘ by 2900 IU/24hr                                                                                             | ↘ by 3400 IU/24hr | ↘ by 3800 IU/24hr | ↘ by 4300 IU/24hr | ↘ by 4800 IU/24hr  | ↘ by 5300 IU/24hr  |                    |
| ≥1.00                        | Non                 |  1hr ** then:<br>↘ by 96 IU/kg/24hr |  perfusion for 1hr ** then |                   |                   |                   |                    |                    | ↘ by 11000 IU/24hr |
|                              |                     |                                                                                                                      | ↘ by 5700 IU/24hr                                                                                             | ↘ by 6700 IU/24hr | ↘ by 7700 IU/24hr | ↘ by 8600 IU/24hr | ↘ by 10000 IU/24hr |                    |                    |

\*Except if major risk of bleeding

\*\*Check how the blood was drawn

If you have any questions, call the hemostasis consultation (XX XXXXX)  
Check anti-Xa HNF activity 6hrs after any change in dose.
